# Supplementary material for: Distinct profile of CD34+ cells and plasma-derived extracellular vesicles from triple-negative patients with Myelofibrosis reveals potential markers of aggressive disease
Source: Springer Nature journal article supplement (doi:10.1186/s13046-020-01776-8), 2021-02-01
Supplement: MOESM1 [file 13046_2020_1776_MOESM1_ESM.pdf]

1 **Supplementary materials**

2 **Tables**

3 Table S1. Characteristics of the patient population.

|                                                         | <b>Total MF<br/>(29 cases)</b> | <b>JAK2<sup>V617F</sup><br/>(23 cases)</b> | <b>TN<br/>(6 cases)</b> |
|---------------------------------------------------------|--------------------------------|--------------------------------------------|-------------------------|
| Median age, years (range)                               | 72 (43-84)                     | 71 (43-82)                                 | 75 (60-84)              |
| Males, no. (%)                                          | 16 (55%)                       | 13 (52%)                                   | 3 (50%)                 |
| Median Hemoglobin, g/dl; median (range)                 | 11.3 (7.1-17.2)                | 11.5 (7.1-17.2)                            | 9.7 (7.5-14.3)          |
| Median Leukocytes, x 10 <sup>9</sup> /l; median (range) | 10.5 (2.5-40)                  | 10.5 (4.7-40)                              | 10.7 (2.5-27)           |
| Median Platelets, x 10 <sup>9</sup> /l; median (range)  | 168 (38-631)                   | 174 (48-631)                               | 121 (38-613)            |
| Median Lymphocyte x 10 <sup>9</sup> /l; median (range)  | 1.2 (0.2-11.7)                 | 1.1 (0.2-5.6)                              | 4.1 (0.4 -11.7)*        |
| Median Monocyte x 10 <sup>9</sup> /l; median (range)    | 0.5 (0.05-5)                   | 0.4 (0.05-2)                               | 0.7 (0.2-5.3)           |
| Blood blasts ≥1%                                        | 8 (27%)                        | 6 (26%)                                    | 2 (33%)                 |
| TSS >20                                                 | 3 (10%)                        | 3 (13%)                                    | 0                       |
| Spleen ≥10 cm                                           | 13 (44%)                       | 11 (47%)                                   | 2 (33%)                 |
| <b>BM fibrosis, no. of patients (%)</b>                 |                                |                                            |                         |
| Grade 2                                                 | 22 (75.8 %)                    | 16 (69.6%)                                 | 6 (100%)                |
| Grade 3                                                 | 7 (24%)                        | 7 (30%)                                    | 0                       |
| <b>IPSS, no. of patients (%)</b>                        |                                |                                            |                         |
| Low                                                     | 2 (6%)                         | 2 (8%)                                     | 0                       |
| Intermediate-1                                          | 11 (37%)                       | 8 (34%)                                    | 3 (50%)                 |
| Intermediate-2                                          | 7 (24%)                        | 6 (26%)                                    | 1 (17%)                 |
| High                                                    | 9 (31%)                        | 7 (30%)                                    | 2 (33%)                 |
| <b>WHO Diagnosis</b>                                    |                                |                                            |                         |
| PMF                                                     | 17 (58%)                       | 12 (52%)                                   | 5 (83%)                 |
| PPV-MF                                                  | 10 (34%)                       | 10 (43%)                                   | 0                       |
| PET-MF                                                  | 2 (6%)                         | 1 (4%)                                     | 1 (17%)                 |
| Unfavourable karyotype <sup>1</sup>                     | 11                             | 10                                         | 1                       |

4 <sup>1</sup> by DIPPS-plus

5

6

7 Table S2. Pathway enrichment analysis for differentially expressed transcripts between EVs from TN  
8 and JAK2V617F-mutated patients.

| Source Pathway                                                                         | P value  | Genes                                                                                                |
|----------------------------------------------------------------------------------------|----------|------------------------------------------------------------------------------------------------------|
| GO-BP Antigen processing and presentation                                              | 2.22E-07 | HLA-DQB1, HLA-DRB1, ULBP3, HLA-DRB4, HLA-B, HLA-DQA2, CD74, HLA-DQA1                                 |
| KEGG Antigen processing and presentation                                               | 6.55E-05 | HLA-DQB1, HLA-DRB1, HLA-DRB4, HLA-B, HLA-DQA2, CD74, HLA-DQA1                                        |
| GO-BP Interferon-gamma-mediated signaling pathway                                      | 2.31E-04 | HLA-DQB1, HLA-DRB1, HLA-DRB4, HLA-B, HLA-DQA2, HLA-DQA1                                              |
| KEGG Cell adhesion molecules (CAMs)                                                    | 3.12E-04 | HLA-DQB1, ITGAL, HLA-DRB1, HLA-DRB4, CNTNAP2, HLA-B, HLA-DQA2, HLA-DQA1                              |
| GO-BP Immune response                                                                  | 4.63E-04 | HLA-DQB1, TNFRSF1B, TNFSF10, TNFSF4, HLA-DRB1, HRH2, HLA-DRB4, HLA-B, HLA-DQA2, CD74, HLA-DQA1, CTSG |
| GO-BP Regulation of immune response                                                    | 0.0129   | ITGAL, ULBP3, TREML2, HLA-B, TYROBP, HCST                                                            |
| GO-BP Calcium-dependent cell-cell adhesion via plasma membrane cell adhesion molecules | 0.0200   | PCDHB9, PCDHB14, PCDHB11                                                                             |
| GO-BP Homophilic cell adhesion via plasma membrane adhesion molecules                  | 0.0353   | PCDHB9, ROBO1, PCDHB14, PCDHB12, PCDHB11                                                             |

9

10 GO-BP, gene ontology biological process

11

12

13

14

15 **Table S3. List of the selected miRNAs with their relative fold-changes (FC).**

| MF vs HD       |       | TN vs JAK2 <sup>V617F</sup> |       |
|----------------|-------|-----------------------------|-------|
| microRNA (miR) | FC    | microRNA (miR)              | FC    |
| miR-127-3p     | 9.25  | miR-122-5p                  | 2.55  |
| miR-15b-5p     | 6.69  | miR-365a-3p                 | 2.52  |
| miR-221-3p     | 5.62  | miR-744-5p                  | 2.47  |
| miR-19a-3p     | 4.07  | miR-27a-3p                  | 2.32  |
| miR-21-5p      | 2.53  | miR-548c-3p                 | 2.05  |
| miR-146a-5p    | 2.27  | miR-361-5p                  | -2.23 |
| miR-222-3p     | 2.18  | let-7b-5p                   | -2.45 |
| miR-24-3p      | 2.07  | miR-34a-5p                  | -4.50 |
| miR-155-5p     | 2.01  |                             |       |
| miR-202-3p     | -2.27 |                             |       |
| miR-212-3p     | -2.60 |                             |       |

16  
17 MiRs validated by RT-qPCR are reported in red.

18  
19  
20  
21  
22  
23  
24  
25  
26  
27  
28  
29  
30  
31  
32  
33  
34  
35  
36  
37  
38  
39  
40  
41  
42  
43

44 **Figures**

45 Figure S1. EV characterization by TME and NTA

46 **a**

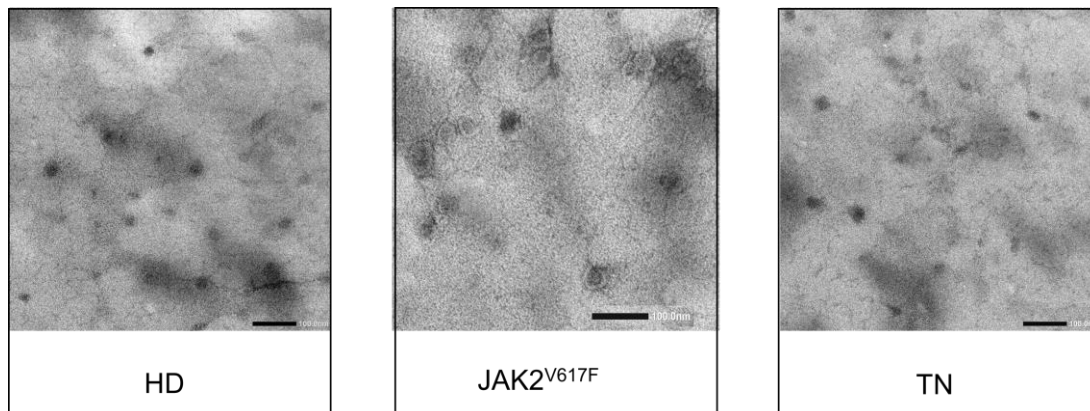

**b**

| Results | HD           | JAK2 <sup>V617F</sup> | TN           |
|---------|--------------|-----------------------|--------------|
| Mean    | 116 ± 13.4   | 119 ± 14.7            | 125.2 ± 14.1 |
| Mode    | 78.7 ± 13.4  | 85.4 ± 14.4           | 89.74 ± 19   |
| SD      | 52.8 ± 8.5   | 53.6 ± 9.1            | 52.34 ± 4.5  |
| D10     | 67.7 ± 8.6   | 67.8 ± 8.5            | 74.61 ± 14   |
| D50     | 101.2 ± 10.8 | 104.8 ± 13.6          | 111 ± 13.9   |
| D90     | 183.1 ± 24.6 | 185 ± 25.1            | 189.6 ± 16.3 |

51

52

53 Figure S1. Characterization of EVs isolated from plasma by ultracentrifugation. (a) Whole-mount  
54 transmission electron micrograph of EVs displaying the characteristic EV morphology in each sample  
55 between HD, *JAK2V617F*-mutated and TN patients. b) Summary of data obtained by Nanosight  
56 equipment for each EV isolated by ultracentrifugation.

57

58

59

60

61

62

63

64

65 Figure S2. Flow cytometry characterization of EVs.

66 a

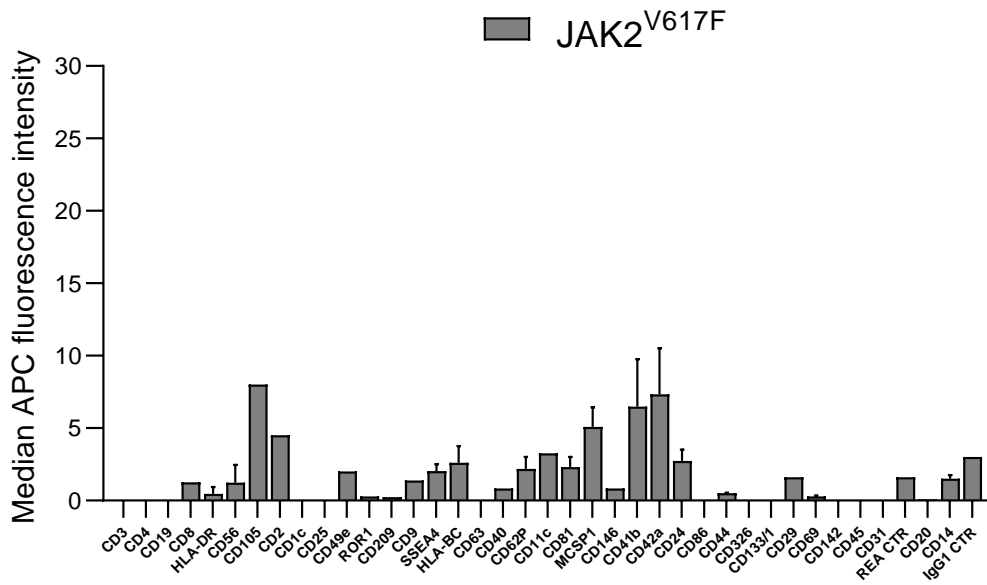

67

68 b

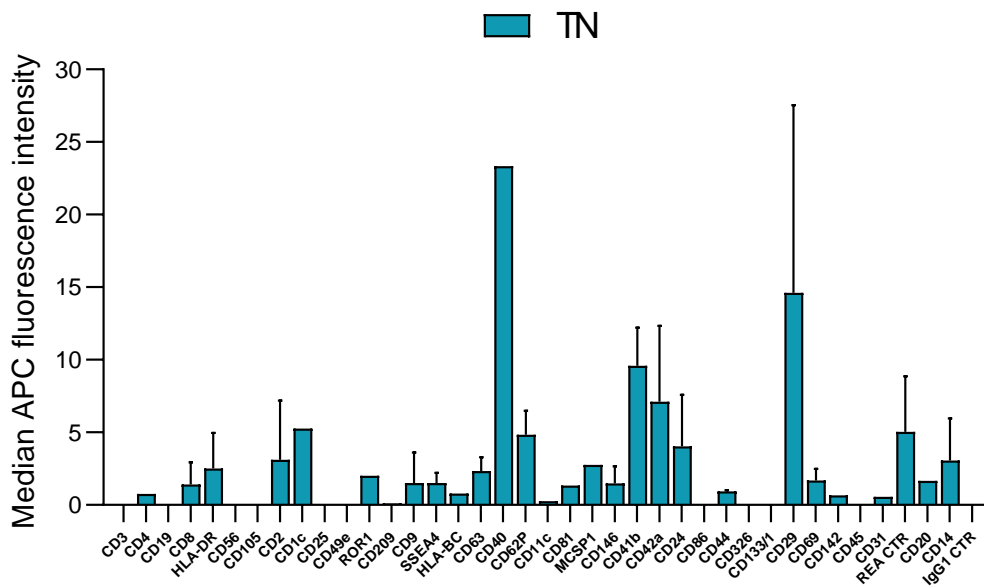

69

70

71

72

73

74

75

c

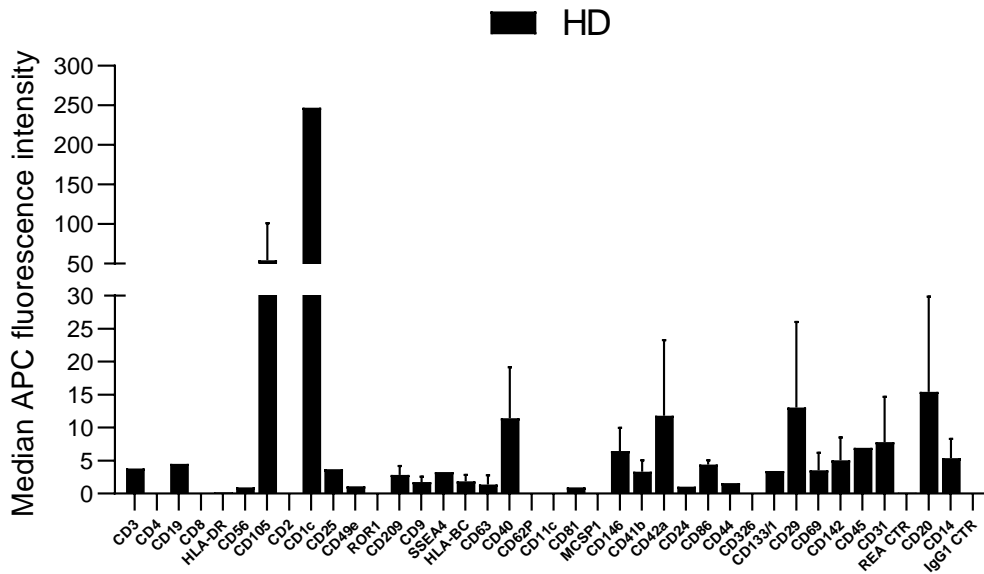

76

77

78

d

79

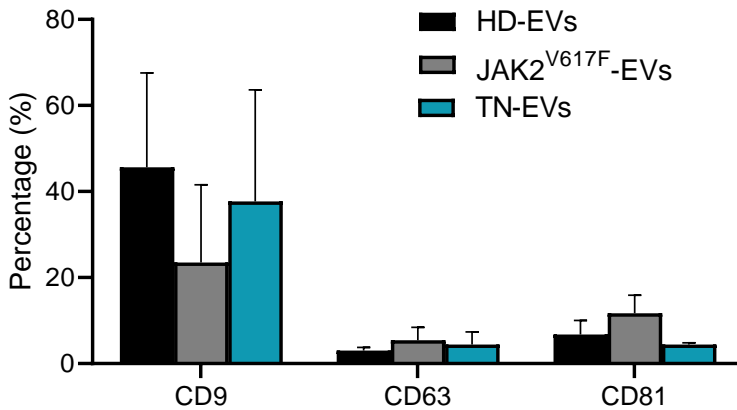

80

81 Figure S2. Surface marker profiles of plasma-derived EV from MF patients and HD. Background  
 82 corrected APC median signal intensities after incubation of plasma-derived EVs from 3  
 83 JAK2<sup>V617F</sup>-mutated patients (a) or 3 TN patients (b) and 3 HD (c). EVs from plasma with 39 capture  
 84 antibody bead populations, followed by staining with a cocktail of anti-CD9-, anti-CD63- and  
 85 anti-CD81-APC antibodies. REA, mlgG1 indicate isotype control-beads. d) CD9, CD63, CD81  
 86 frequency in EVs by flow cytometry.

87

88

89

90 Figure S3. Representative western blot and quantification graph for TOMM20

91 a

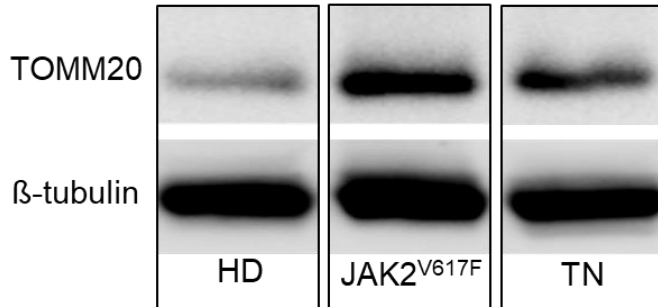

b

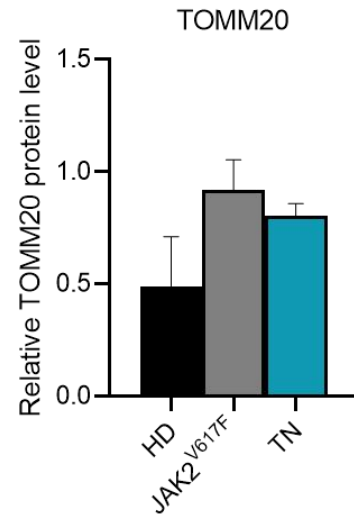

92

93

94 a) Representative western blot of EVs preparation from HD, JAK2<sup>V617F</sup>-mutated, and TN  
95 patient-derived plasma.  $\beta$ -tubulin was used as a loading control. b) Graphic representation of  
96 quantification for TOMM20 expression normalized to the relative  $\beta$ -tubulin from HD (n=3),  
97 JAK2<sup>V617F</sup>-mutated (n=3), and TN (n=2) patients. The translocase of outer mitochondrial membrane  
98 20 (TOMM20) protein level was determined using the ImageJ analysis software and normalized to  
99  $\beta$ -tubulin, taken as an index of loading control. Histograms show the mean  $\pm$  SEM.
